# Supplementary material for: Direct growth of NiCo2O4 nanostructures on conductive substrates with enhanced electrocatalytic activity and stability for methanol oxidation
Source: Royal Society of Chemistry journal article supplement (doi:10.1039/c3nr01104f), 2013-01-01
Supplement: c3nr01104f.pdf [file c3nr01104f.pdf]

# Direct growth of NiCo<sub>2</sub>O<sub>4</sub> nanostructure on conductive substrates with enhanced electrocatalytic activity and stability for methanol oxidation

Lei Qian<sup>a</sup>, Li Gu<sup>a</sup>, Li Yang<sup>a</sup>, Hongyan Yuan<sup>b</sup>, Dan Xiao<sup>a, b, \*</sup>

<sup>a</sup>College of Chemistry and <sup>b</sup>College of Chemical Engineering, Sichuan University, 29 Wangjiang Road, Chengdu 610064, PR China.

\* Corresponding authors. Fax: +86-28-85416029; Tel: +86-28-85415029; E-mail address: [xiaodan@scu.edu.cn](mailto:xiaodan@scu.edu.cn)

## Supporting Informations

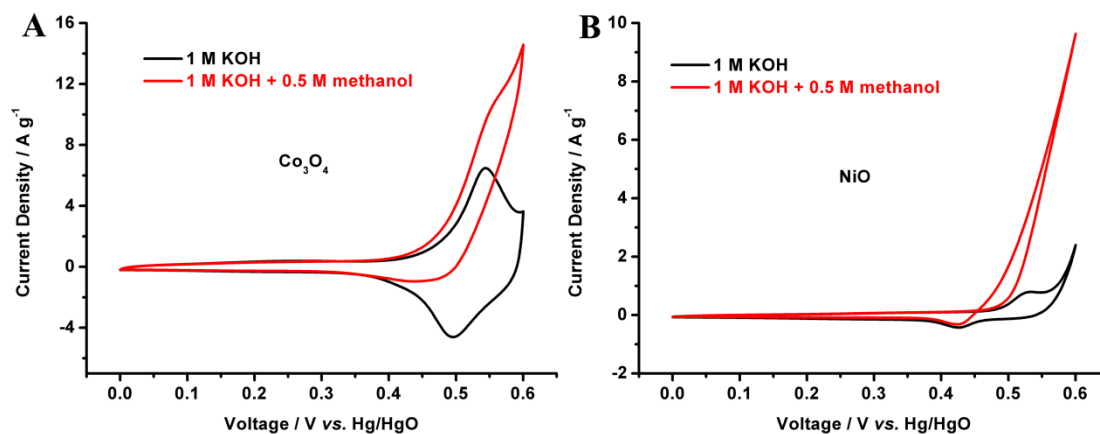

Fig. S1. CV curves of Co<sub>3</sub>O<sub>4</sub>/SS (A) and NiO/SS (B) electrode in 1 M KOH with and without 0.5 M methanol at a scan rate of 10 mV s<sup>-1</sup>.

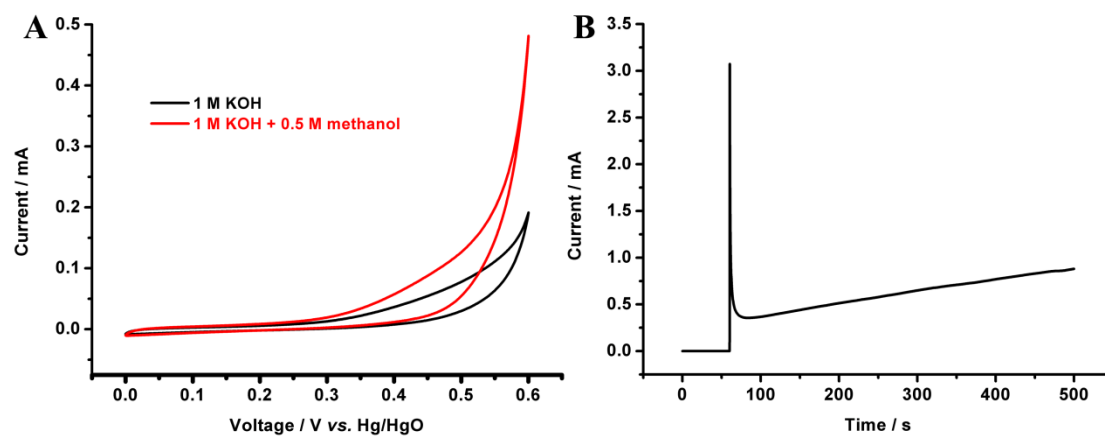

Fig. S2. (A) CV curves of blank SS in 1 M KOH with and without 0.5 M methanol at a scan rate of 10 mV s<sup>-1</sup>. (B) Chronoamperometry curves of blank SS in 1 M KOH with 0.5 M methanol at

potential of 0 V (0-60 s) and 0.6 V (60-500 s).

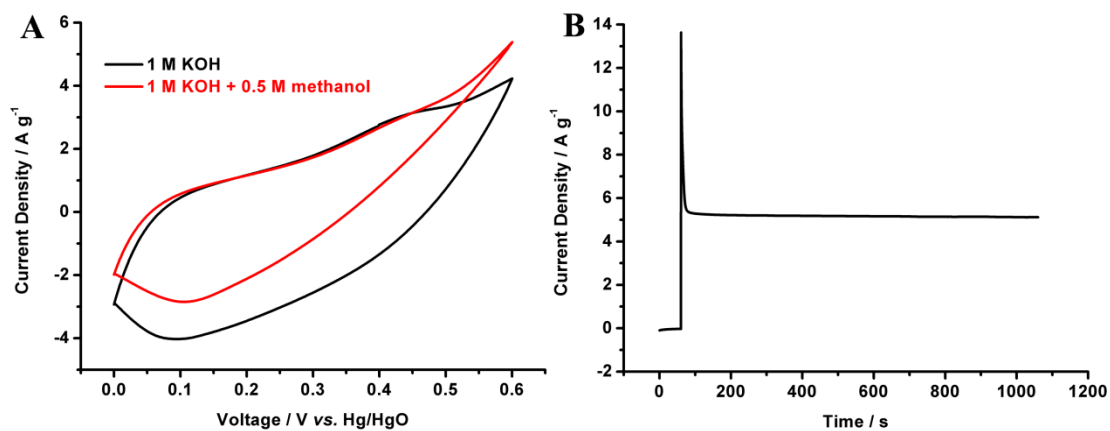

Fig. S3. (A) CV curves of NiCo<sub>2</sub>O<sub>4</sub>/ITO electrode in 1 M KOH with and without 0.5 M methanol at a scan rate of 10 mV s<sup>-1</sup>. (B) Chronoamperometry curves of NiCo<sub>2</sub>O<sub>4</sub>/ITO electrode in 1 M KOH with 0.5 M methanol at potential of 0 V (0-60 s) and 0.6 V (60-1060 s).

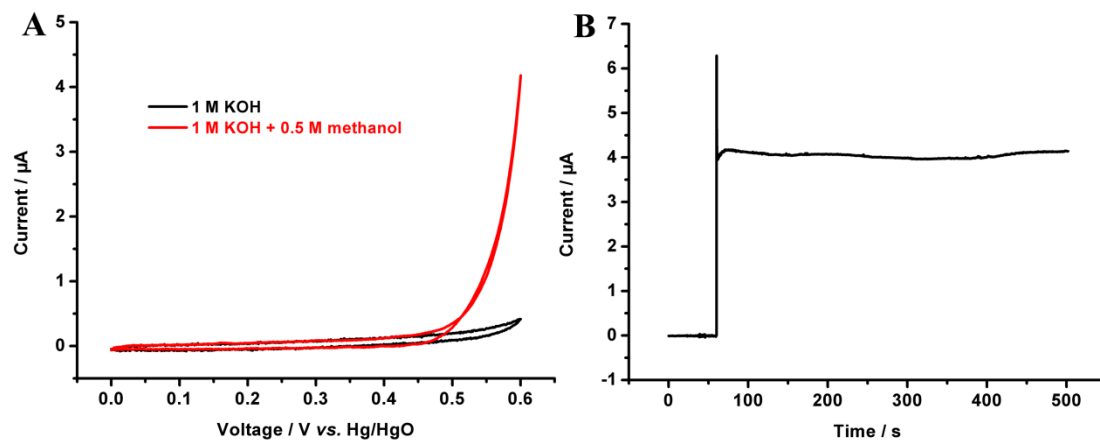

Fig. S4. (A) CV curves of blank ITO in 1 M KOH with and without 0.5 M methanol at a scan rate of 10 mV s<sup>-1</sup>. (B) Chronoamperometry curves of blank ITO in 1 M KOH with 0.5 M methanol at potential of 0 V (0-60 s) and 0.6 V (60-500 s).
